# Supplementary material for: Morphology-controlled hydrothermal synthesis and multifunctional luminescence properties of micro-crystals Gd6O5F8:Eu3+/Tb3+/Tm3+
Source: Royal Society of Chemistry journal article supplement (doi:10.1039/c5ce02129d), 2015-12-21
Supplement: c5ce02129d1.pdf [file c5ce02129d1.pdf]

## Supporting information

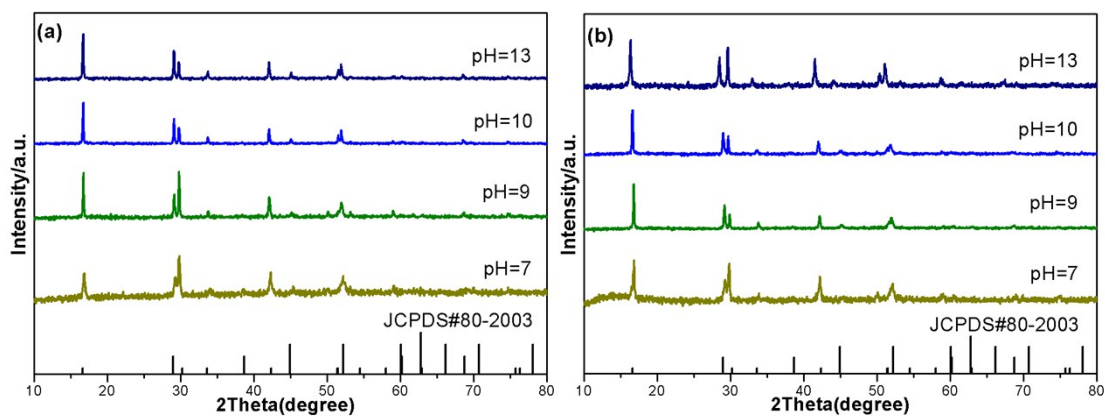

Fig.S1 XRD patterns of the precursor prepared at various pH values pH = 7, 9, 10, 13 (a)  $\text{NH}_3 \cdot \text{H}_2\text{O}$  as the pH regulator; (b) using NaOH as the pH regulator.

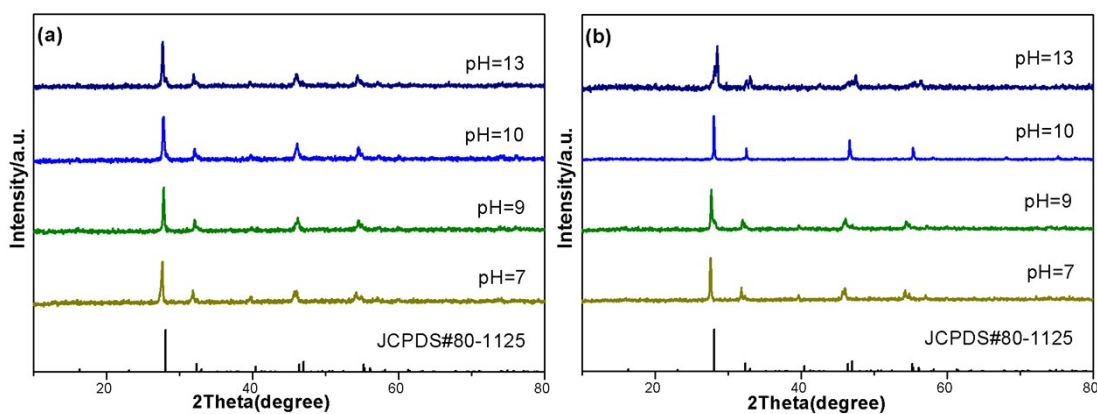

Fig.S2 XRD patterns of the ultimate product prepared at various pH values pH = 7, 9, 10, 13 (a)  $\text{NH}_3 \cdot \text{H}_2\text{O}$  as the pH regulator; (b) using NaOH as the pH regulator.

| <b>(a)</b>                 |                                                 |                             |  |  |
|----------------------------|-------------------------------------------------|-----------------------------|--|--|
| <b>Formula</b>             | <b>Gd<sub>6</sub>O<sub>5</sub>F<sub>8</sub></b> |                             |  |  |
| <b>Crystal system</b>      | <b>Orthorhombic</b>                             |                             |  |  |
| <b>Space group</b>         | <b><i>Pcmb</i> (57)</b>                         |                             |  |  |
| <b>Cell parameters</b>     | <b>a=5.5251</b>                                 | <b>α=β=γ=90°</b>            |  |  |
|                            | <b>b=33.4860</b>                                |                             |  |  |
|                            | <b>c=5.5829</b>                                 |                             |  |  |
| <b>Reliability factors</b> | <b>Sig=1.383</b>                                | <b>R<sub>wp</sub>=6.83%</b> |  |  |
|                            | <b>R<sub>exp</sub>=5.53%</b>                    | <b>R<sub>p</sub>=4.29%</b>  |  |  |

  

| <b>(b)</b>   |             |               |               |               |
|--------------|-------------|---------------|---------------|---------------|
| <b>Atom</b>  | <b>Wyck</b> | <b>x</b>      | <b>y</b>      | <b>z</b>      |
| <b>Gd(1)</b> | <b>4c</b>   | <b>0.7967</b> | <b>0</b>      | <b>0.25</b>   |
| <b>Gd(2)</b> | <b>8e</b>   | <b>0.2906</b> | <b>0.0837</b> | <b>0.2439</b> |
| <b>Gd(3)</b> | <b>8e</b>   | <b>0.7182</b> | <b>0.1665</b> | <b>0.2348</b> |
| <b>Gd(4)</b> | <b>4c</b>   | <b>0.2864</b> | <b>0.25</b>   | <b>0.2899</b> |
| <b>O(1)</b>  | <b>8e</b>   | <b>0.49</b>   | <b>0.0417</b> | <b>0.025</b>  |
| <b>O(2)</b>  | <b>8e</b>   | <b>0.464</b>  | <b>0.1253</b> | <b>0.99</b>   |
| <b>O(3)</b>  | <b>8e</b>   | <b>0.448</b>  | <b>0.2097</b> | <b>0.006</b>  |
| <b>F(1)</b>  | <b>8e</b>   | <b>0.448</b>  | <b>0.2097</b> | <b>0.006</b>  |
| <b>F(2)</b>  | <b>8e</b>   | <b>0.031</b>  | <b>0.0360</b> | <b>0.426</b>  |
| <b>F(3)</b>  | <b>8e</b>   | <b>0.928</b>  | <b>0.111</b>  | <b>0.11</b>   |
| <b>F(4)</b>  | <b>8e</b>   | <b>0.09</b>   | <b>0.182</b>  | <b>0.368</b>  |
| <b>F(5)</b>  | <b>4d</b>   | <b>0.903</b>  | <b>0.251</b>  | <b>0.149</b>  |

Table.S1 (a) Refinement structure parameters and reliability factors and (b) atom site parameters.

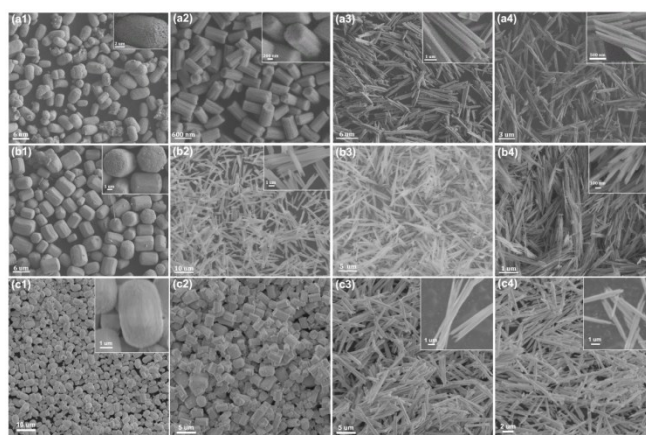

Fig.S3 SEM images of precursor while using NH<sub>4</sub>F as fluorine source and diluted NH<sub>3</sub>•H<sub>2</sub>O as pH regulator (a1) pH=7, (a2) pH=9, (a3) pH=10, (a4) pH=13; while using NH<sub>4</sub>F as fluorine source and diluted NaOH as pH regulator (b1) pH=7, (b2) pH=9, (b3) pH=10, (b4) pH=13; while using NaF as fluorine source and diluted NH<sub>3</sub>•H<sub>2</sub>O as pH regulator (c1) pH=7, (c2) pH=9, (c3) pH=10, (c4) pH=13.

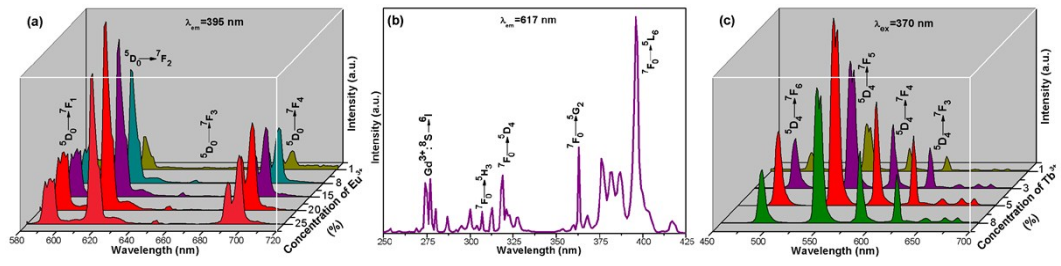

Fig.S4 PL spectra under UV (a) emission of  $\text{Gd}(\text{OH})_{2.14}\text{F}_{0.86}$ :  $x\% \text{Eu}^{3+}$  ( $1 \leq x \leq 25$ ); (b) excitation of  $\text{Gd}(\text{OH})_{2.14}\text{F}_{0.86}$  and (c) emission of  $\text{Gd}(\text{OH})_{2.14}\text{F}_{0.86}$ :  $x\% \text{Tb}^{3+}$  ( $1 \leq x \leq 8$ ).

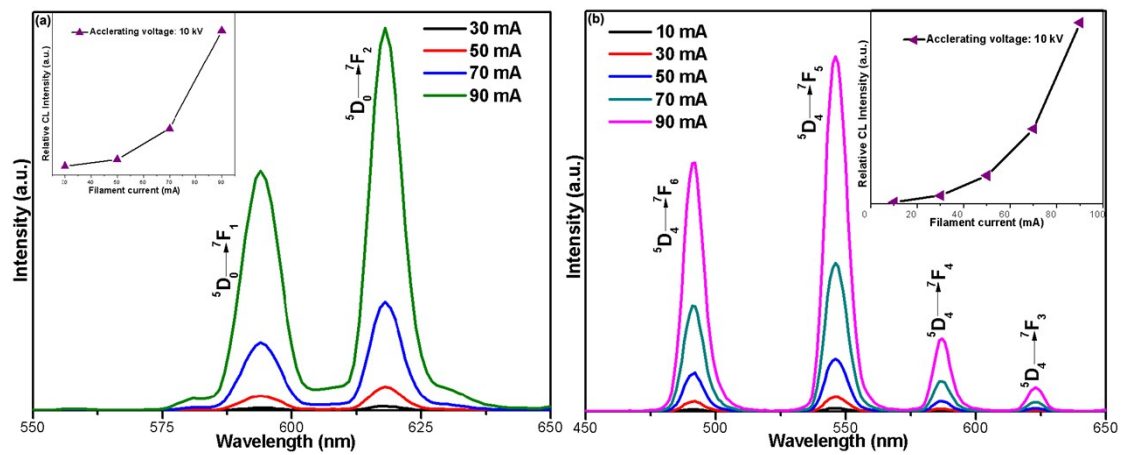

Fig.S5 CL spectra from (a)  $\text{Gd}(\text{OH})_{2.14}\text{F}_{0.86}$ :  $\text{Eu}^{3+}$  (20%) and (b)  $\text{Gd}(\text{OH})_{2.14}\text{F}_{0.86}$ :  $\text{Tb}^{3+}$  (5%) measured at 10 kV and various filament currents.
